# Supplementary material for: Improvement and use of CRISPR/Cas9 to engineer a sperm-marking strain for the invasive fruit pest Drosophila suzukii
Source: BMC Biotechnol. 2019 Dec 5;19:85. doi: 10.1186/s12896-019-0588-5 (PMC6896403; doi:10.1186/s12896-019-0588-5)
Supplement: Supplementary file 1 — Additional file 1: Table S1. List of primers used. [file 12896_2019_588_MOESM1_ESM.xlsx]

## Sheet: Sheet1
Code	Name	Sequence 5'-3'
HM#23	AgeI_srya_F4	GAACCGGTGTGCACAAGCGAGTCCACCAG
HM#24	NheI_Srya_R	CCGCTAGCCCTAGGAGCTCTATAAGATGTGCT
HM#25	Ds_B2t_F1	AAGATGCGTGAAATCGTGCACATTCAG
HM#26	Ds_B2t_R1	TTATTCATCGCCGCCACCCTCTTC
HM#33	Ds_B2t_GSP	GTCCGGCCTGAATGTGCACGATTTCACGC
HM#37	Hma-44F	ACTCATCGATATGGCCTCCTCCGAGGACGTCATC
HM#41	B2t5UTR-F1	AGTCCACCCTAGTATCAGCTAGCAAGCACACG
HM#55	HindIII-T7-BbsI-F	AGCTTGATGTGAATTGTAATACGACTCACTATAGGGTCTTCGAGAAGACCT
HM#56	BbsI-T7-HindIII-R	AAACAGGTCTTCTCGAAGACCCTATAGTGAGTCGTATTACAATTCACATCA
HM#69	DsRed-mega-R	GGAAGGACAGCTTCTTGTAGTCGGGG
HM#73	hspEcoRIF2	GCGAATTCTCCAGAAACTCAAACAGAAACC
HM#75	Dshsp-ClaIR	GCATATCGATTTGTGTGTTTGTGTTTGTGGATGCAGTTG
HM#84	chiRNA_R	AAAAAGCACCGACTCGGTGCCACTTTTTCAAGTTG
HM#104	DsU6MegaF	CGAGGTCGACGGTATCGATAAGCTTGTTCCTTGCTAACAATATCTTTTTATGTCATTTCC
HM#127	HM_pSL_F	CGAAAGGGGGATGTGCTGCAAGGCGATTAAG
HM#128	HM_pSL_R	CCGGCTCGTATGTTGTGTGGAATTGTG
HM#137	U6_neuF2	CGTTTGGGAGCAGGGCTTCACCTTCCTGG
HM#138	U6_neuR2	GCACTCGTATCACCCACAGCGATGAACACG
HM#152	pET_BsaI_BsaIF	TATGGAGACCGTCGACCTAGGGAGACC
HM#153	pET_BsaI_BsaIR	TCGAGGTCTCCCTAGGTCGACGGTCTCCA
HM#158	DsU6MegaR2	CTCTAAAACAGGTCTTCTCGAAGACCCGAAGTTCAAGTGAGATTCTTCCCTATTTATATTG
HM#159	U6a_Mega_R2	CTCTAAAACAGGTCTTCTCGAAGACCCGAAGTTCAAGTGGGTTTCTTCCCTATTTATACTGC
HM#160	U6c_Mega_R2	CTCTAAAACAGGTCTTCTCGAAGACCCGATTTCGTATTGAAAAATGTCGTATATATACTACC
HM#161	Red_T1F	CTTCGGATCCACTAGTCGCCACCA
HM#162	Red_T1R	AAACTGGTGGCGACTAGTGGATCC
HM#169	Red_T1_CF	AATCGGATCCACTAGTCGCCACCA
HM#167	Red_T5F	CTTCGAACAGGTGGTGGCGGCCCT
HM#180	NdeI_Histag_F	TATGCATCATCATCATCACCA
HM#181	NdeI_Histag_R	TATGGTGATGATGATGATGCA
HM#186	U6_Down_MegaF	CTTGAAAAAGTGGCACCGAGTCGGTGCTTTTTTTGCAAACCTGAGGGTGAATATTCAAAC
HM#187	U6_Down_MegaR	GTGGATCCCCCGGGCTGCAGGAATTCGATATGTATGCGTTAAGCAAAAATTGAAAACATAAC
HM#192	PUbT7	CGAACGCACTCGAGCATTTGTGTGCATG
HM#215	T7_Red1F	TATAGGATCCACTAGTCGCCACCA
HM#221	Red1_mutG2AF	CATGATGAGCAAGGGCGAGGAGCTGTTC
HM#222	Red1_mutG2AR	GCTCATCATGGTGGCGACCGGTGGATC
HM#252	B2t-DsRedR	GATGACGTCCTCGGAGGAGGCCATCTTAACCGACTGTCAAGGAAC
HM#285	SV40-B2tF	CATCAATGTATCTTAAACTCATCGATATCGTAGTAGGCAAGCTAATAACC
HM#358	U6a_Mega_F	CGAGGTCGACGGTATCGATAAGCTTTCCGCCGAGTCGCCCATCAGCGAGGAGG
HM#360	U6c_Mega_F	CGAGGTCGACGGTATCGATAAGCTTGTTCCTTAAACACTCAATATTTTTATAATCTGC
